# Supplementary material for: Absolute quantum yield measurements of colloidal NaYF4: Er3+, Yb3+ upconverting nanoparticles
Source: Royal Society of Chemistry journal article supplement (doi:10.1039/c0nr00253d), 2010-01-01
Supplement: c0nr00253d.pdf [file c0nr00253d.pdf]

## **Supplementary Materials**

### **Absolute Quantum Yield Measurements of Colloidal NaYF<sub>4</sub> Upconverting Nanoparticles**

**John-Christopher Boyer and Frank C. J. M. van Veggel**

**University of Victoria, Department of Chemistry, P. O. Box 3065, Victoria, British Columbia, Canada, V8W 3V6.**

### **Synthetic Procedures**

All chemicals utilized in the synthesis of the upconverting nanoparticles and bulk sample were purchased from Aldrich and used as received.

### **Synthesis of Bulk NaYF<sub>4</sub> material**

The lanthanide trifluoroacetate precursors were prepared from the corresponding lanthanide and yttrium oxides and trifluoroacetic acid (99%). In the case of the NaYF<sub>4</sub>: Er<sup>3+</sup>2 mol%, Yb<sup>3+</sup>20 mol% codoped sample, 9.6 mg (0.025 mmol) of Er<sub>2</sub>O<sub>3</sub>, 98.5 mg (0.25 mmol) of Yb<sub>2</sub>O<sub>3</sub>, and 220.2 mg (0.975 mmol) of Y<sub>2</sub>O<sub>3</sub> were dissolved in 10 mL of 50% aqueous trifluoroacetic acid at 80 °C. The residual water and acid were then slowly evaporated at 80 °C. Subsequently, 0.3400 g (2.5 mmol) of sodium trifluoroacetate (98%) was added to the lanthanide trifluoroacetates and the powders were ground with a mortar and pestle. The resulting powder was heated to 110 °C in an oven and maintained at this temperature overnight to remove any residual moisture. The powder was then placed in a crucible and heated to a temperature of 400 °C at a rate of 10 °C/min under air in a tube furnace and kept at this temperature for 4 hr. The furnace was then left to cool to RT. The resulting solid was then ground with a mortar and pestle to obtain a fine powder.

### **Synthesis of 10 nm NaYF<sub>4</sub> nanoparticles**

The 10 nm NaYF<sub>4</sub>: Er<sup>3+</sup>2 mol%, Yb<sup>3+</sup>20 mol% nanoparticle sample was synthesized using the synthetic procedure outlined in the following publication:

G. S. Yi and G. M. Chow, *Advanced Functional Materials*, 2006, **16**, 2324.

No changes were made to the reported procedure.

### **Synthesis of 30 nm and 100 nm NaYF<sub>4</sub> nanoparticles**

The 30 nm and 100 nm NaYF<sub>4</sub>: Er<sup>3+</sup>2 mol%, Yb<sup>3+</sup>20 mol% nanoparticle samples were synthesized using the synthetic procedures outlined in the following publications:

H.-S. Qian and Y. Zhang, *Langmuir*, 2008, **24**, 12123.

Z. Li and Y. Zhang, *Nanotechnology*, 2008, **19**, 345606/1.

No changes were made to the reported procedures.

### **Synthesis of 30 nm NaYF<sub>4</sub> core/shell nanoparticles**

The 30 nm NaYF<sub>4</sub>: Er<sup>3+</sup>2 mol%, Yb<sup>3+</sup>20 mol% / NaYF<sub>4</sub> core/shell nanoparticle sample was synthesized using the synthetic procedure outlined in the following publication:

H.-S. Qian and Y. Zhang, *Langmuir*, 2008, **24**, 12123.

No changes were made to the reported procedures.

## **Powder X-ray Diffraction**

Powder X-ray diffraction (XRD) data were acquired with a Rigaku Miniflex Diffractometer. Concentrated colloids of the NaYF<sub>4</sub> nanoparticle samples in hexanes were drop-cast onto a zero-background holder and allowed to dry. Step-scan X-ray powder diffraction data were collected using a Rigaku Miniflex Diffractometer. A Cr radiation source was used at 30 kV and 15 mA with a K $\beta$  filter, a 4.2° scattering slit, and a 0.3 mm receiving slit. XRD data was collected in the 20-140° (2 $\theta$ ) range with a scanning step size of 0.02° (2 $\theta$ ) and a counting time of 3 s per step.

## **Transmission Electron Microscopy**

TEM was performed on the NaYF<sub>4</sub>: Er<sup>3+</sup>2%, Yb<sup>3+</sup>20% nanoparticle samples using a Hitachi H-7000 microscope operating at 75 kV equipped with a charge-coupled device (CCD)-camera. A small amount of the sample (~1 mg) was dispersed in 1 g of hexane to give an approximate 0.1 wt% solution. One drop of the resulting nanoparticle dispersion was dropcasted on a formvar/carbon film supported on a 300 mesh copper grid (3 mm in diameter) and allowed to dry in air at room temperature.

**Table S1.** Raw data used for calculation of upconversion quantum yields for NaYF<sub>4</sub>: Er<sup>3+</sup> 2 mol%, Yb<sup>3+</sup> 20 mol% samples. The number of  $h\nu$  Absorbed must be multiplied by 10000 to take into the account attenuation factor of the neutral density filter.

| Samples      | Power Density (W/cm <sup>2</sup> ) | Number of $h\nu$ Emitted | Number of $h\nu$ Absorbed |
|--------------|------------------------------------|--------------------------|---------------------------|
| <b>ErYb1</b> | 20                                 | 40989                    | 132                       |
| <b>ErYb2</b> | 150                                | 26118                    | 1154                      |
| <b>ErYb3</b> | 150                                | 16101                    | 1321                      |
| <b>ErYb4</b> | 150                                | 428                      | 1257                      |
| <b>ErYb5</b> | 150                                | 27916                    | 1380                      |

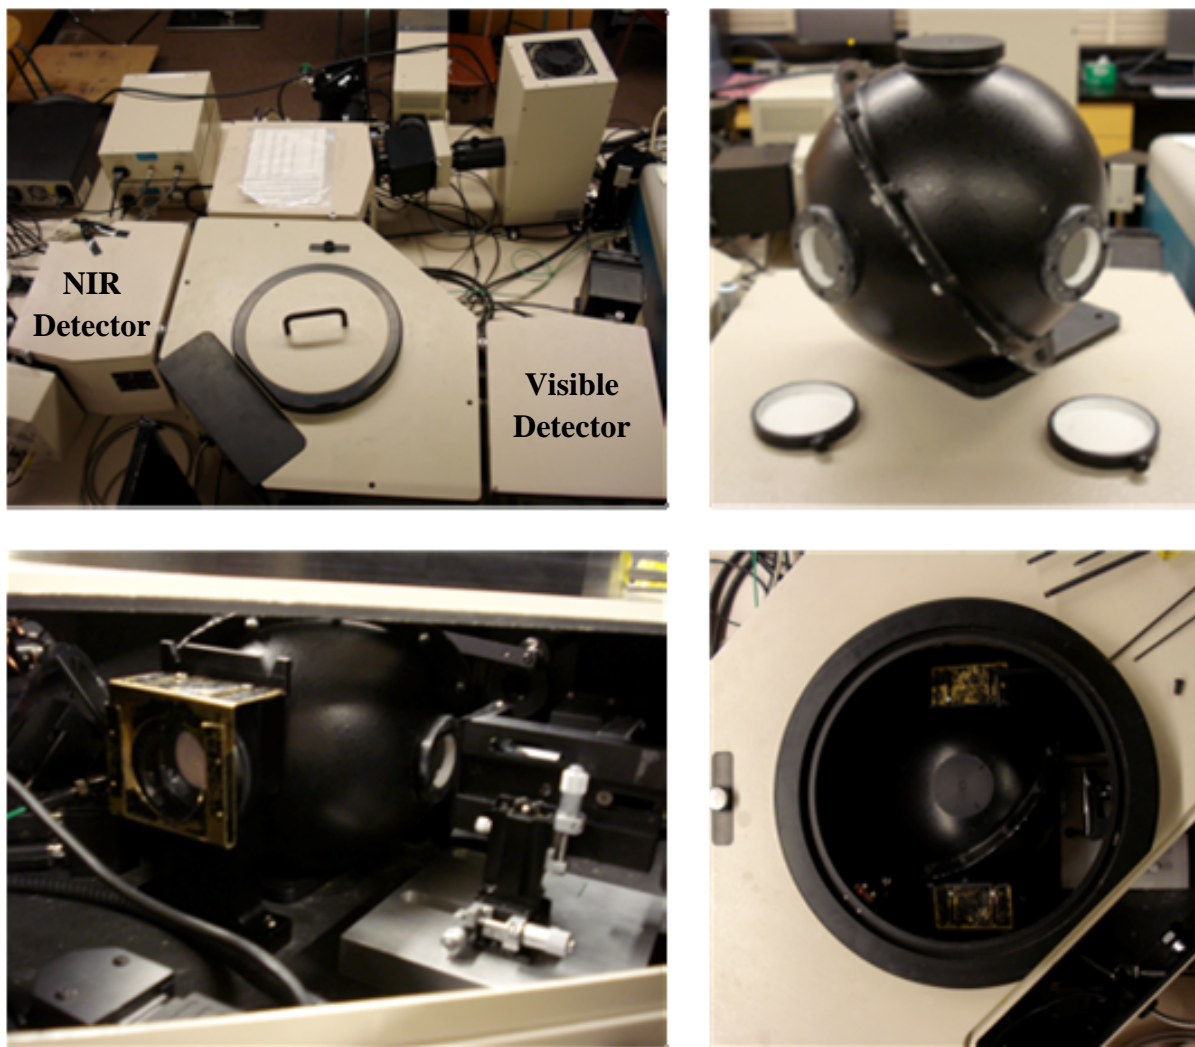

**Figure S1.** Photos of the experimental set-up showing the position of the diode laser and integrating sphere in the fluorimeter.

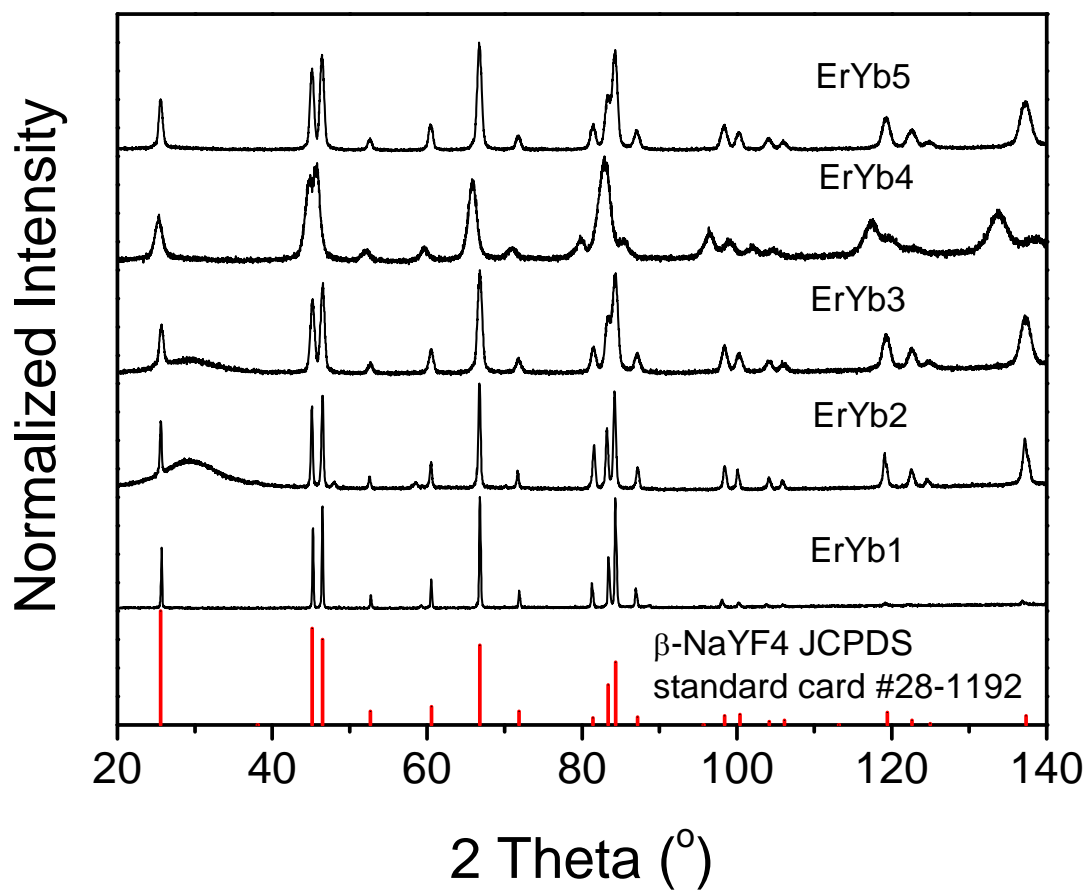

**Figure S2.** Experimental X-ray diffraction (XRD) patterns for NaYF<sub>4</sub>: Er<sup>3+</sup> 2%, Yb<sup>3+</sup> 20% nanoparticle and bulk samples. Broad peak located at 30° is attributed to organic oleate layer.

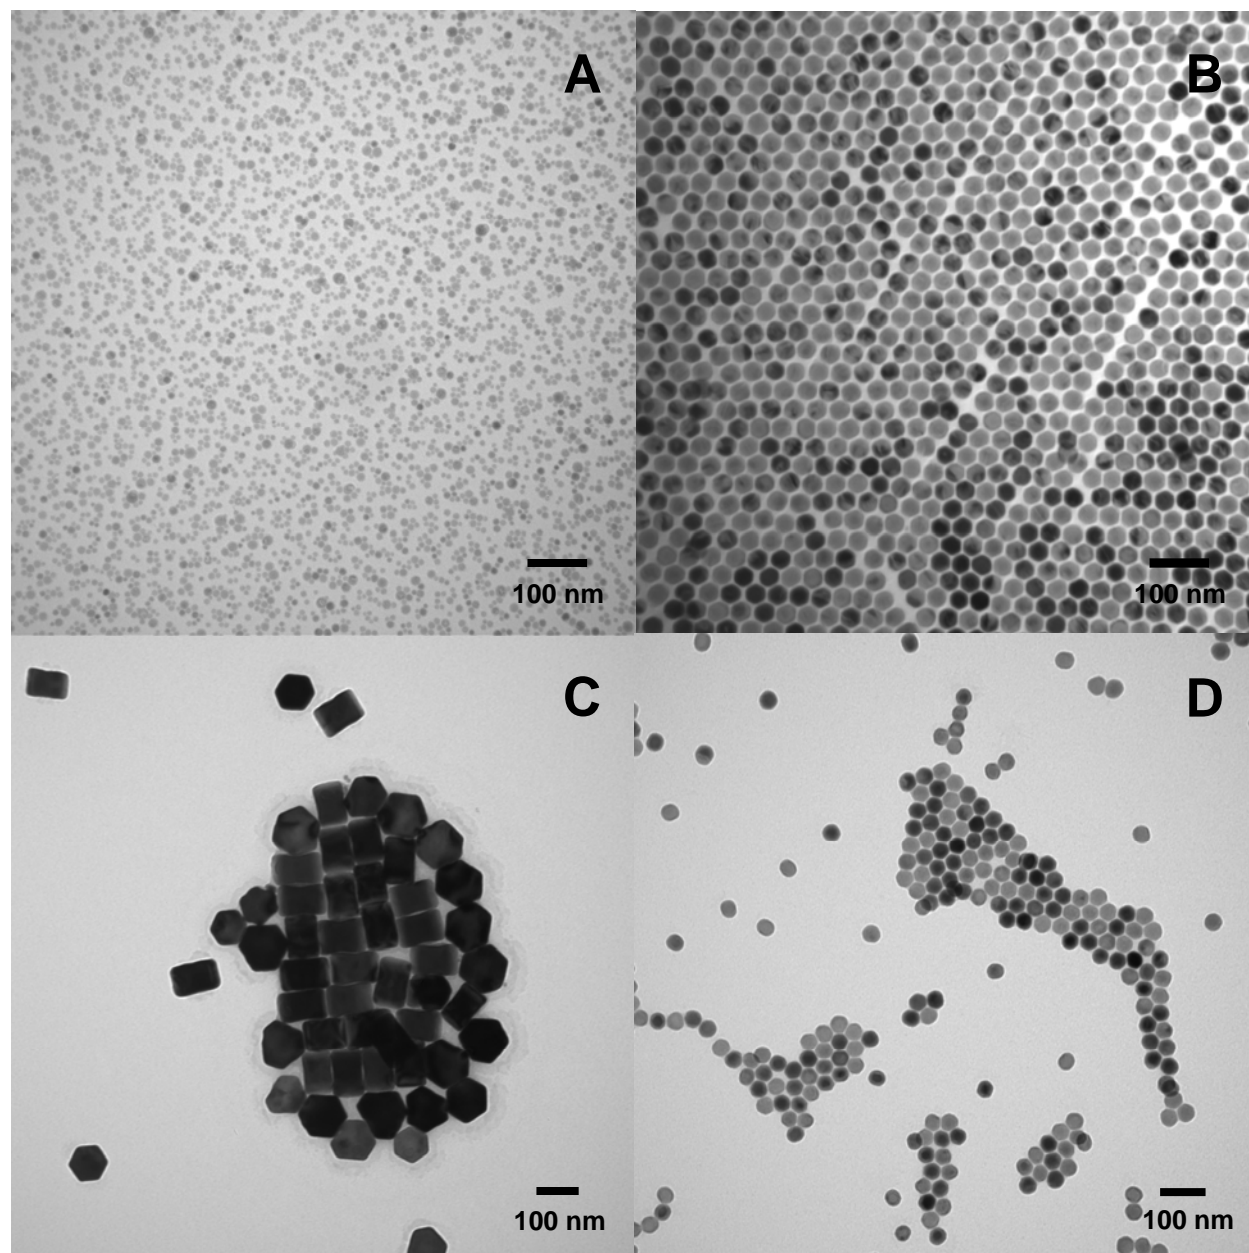

**Figure S3.** Transmission Electron Microscopy (TEM) images of NaYF<sub>4</sub>: Er<sup>3+</sup> 2%, Yb<sup>3+</sup> 20% nanoparticles with average particle size of A) 10 nm, B) 30 nm, and C) 100 nm, respectively. D) TEM image of NaYF<sub>4</sub>: Er<sup>3+</sup> 2%, Yb<sup>3+</sup> 20% / NaYF<sub>4</sub> core/shell nanoparticles.
